# Supplementary material
Source: Research Square preprint supplement (doi:10.21203/rs.3.rs-9658228/v1)
Supplement: Supplementary file 1 [file b4b582075e7f82ef71429a6a.docx]

**Supplementary Materials**

| **Supplementary Table 1.** Percent change in body composition after 6 months of ADT +/- AR pathway inhibitor (n=56) | |
| --- | --- |
| **Body composition measure** | **% change (median, *IQR*)** |
| Skeletal muscle mass (SMMi) | -8.6%  (-12.9%, -6.1%) |
| Skeletal muscle density (SMD) | -11.9%  (-18.3%, -1.2%) |
| Intramuscular adipose tissue (IMAi) | 11.3%  (-0.6 %, 32%) |
| Visceral adipose tissue (VATi) | -2.2 %  ( -18.3%, 11%) |
| Subcutaneous adipose tissue (SATi) | 13.2 %  ( -4.7%, 23.9%) |
| Total adipose tissue (TATi) | 3.4 %  (-13.2%, 20.1%) |
| **Abbreviations:** IQR = interquartile range | |

| **Supplementary table 2.** Association ofbaseline body composition with pathologic response. | | | | |
| --- | --- | --- | --- | --- |
|  | **No pathologic response** (*n* =65) | **Pathologic response** (*n* =39) | **Total** (*n* =104) | **p-value** |
| BMI, median, (*IQR*) | 28.8  (27.1–32.0) | 27.3  (24.7–30.5) | 28.5  (26.2–31.4) | 0.054 |
| SMMi, median, (*IQR*) | 55.3  (52.1–60.8) | 52.9  (48.6–60.4) | 55.0  (50.0–60.8) | 0.20 |
| Sarcopenia, *n* (%) | 18 (27.7%) | 11 (28.9%) | 29 (28.2%) | 0.89 |
| Sarcopenic obesity, *n* (%) | 5 (10.6%) | 3 (10.0%) | 8 (10.4%) | >0.99 |
| SMD, median, (*IQR*) | 44.0  (37.3–49.1) | 45.1  (40.7–51.6) | 44.3  (38.9–49.3) | 0.18 |
| SMD low, *n* (%) | 8 (12.3%) | 4 (10.3%) | 12 (11.5%) | >0.99 |
| IMAi, median, (*IQR*) | 3.0  (1.9–4.5) | 2.6  (1.7–4.8) | 2.7  (1.8–4.6) | 0.47 |
| VATi, median, (*IQR*) | 70.9  (49.6–96.2) | 63.9  (39.0–90.0) | 66.5  (45.8–92.0) | 0.18 |
| SATi, median, (*IQR*) | 63.0  (50.9–72.5) | 55.5  (38.8–71.6) | 59.1  (46.7–72.4) | 0.12 |
| TATi, median, (*IQR*) | 137.0  (106.5–178.5) | 121.6  (86.1 –167.7) | 133.0  (99.9–170.7) | 0.07 |
| **Abbreviations:** *n*, number of patients; BMI, body mass index; IQR, interquartile range; SMMi, skeletal muscle mass index; n, number; SMD, skeletal muscle density; IMAi, intermuscular adipose tissue index; VATi, visceral adipose tissue index; SATi, subcutaneous adipose tissue index; TATi, total adipose tissue index. | | | | |

| **Supplementary table 3.** Association of baseline body composition with PSA progression-free survival after radical prostatectomy. | | |
| --- | --- | --- |
| **Baseline characteristics** | **HR**  **(95% CI)** | **p-value** |
| Skeletal muscle mass1 | 1.13  (0.83–1.54) | 0.43 |
| Skeletal muscle density1 | 0.77  (0.57–1.03) | 0.08 |
| Skeletal muscle density low2 | 1.08  (0.46–2.53) | 0.85 |
| Sarcopenia2 | 0.98  (0.56–1.72) | 0.95 |
| Sarcopenic obesity2 | 0.61  (0.22–1.72) | 0.35 |
| Intermuscular adipose tissue index1 | 1.01  (0.37–2.75) | 0.99 |
| Visceral adipose tissue index1 | 1.04  (0.97–1.11) | 0.28 |
| Subcutaneous adipose tissue index1 | 1.08  (0.97–1.20) | 0.18 |
| Total adipose tissue index1 | 1.04  (0.99–1.09) | 0.15 |
| ¹HR per 10-unit increase in the continuous measure.  ²HR for presence versus absence (yes vs. no).  Abbreviations: HR, hazard ratio; CI, confidence interval; PFS, progression-free survival. | | |

| **Supplementary table 4.** Baseline lipid metabolites and pathologic response. | | | | | |
| --- | --- | --- | --- | --- | --- |
|  | Pathologic response | No pathologic response | Fold change | p-value | FDR q-value |
| Metabolite | Mean +/- SD | Mean +/- SD |
| **Carnitine** |  | | | | |
| L-carnitine | 66477 +/- 12490 | 65986 +/- 15566 | 1.007 | 0.9247 | 0.99692 |
| Acylcarnitine (C16:0) | 5836 +/- 1373 | 6435 +/- 1505 | 0.907 | 0.1088 | 0.99692 |
| Acylcarnitine (C18:0) | 1880 +/- 583 | 1918 +/- 462 | 0.980 | 0.3595 | 0.99692 |
| Acylcarnitine (C18:1) | 9923 +/- 3029 | 10593 +/- 3092 | 0.937 | 0.4298 | 0.99692 |
| Acylcarnitine (C18:2n-6) | 6273 +/- 2054 | 6093 +/- 1527 | 1.030 | 0.9372 | 0.99692 |
| **Sulfatides & related glycosphingolipids** |  | | | | |
| 3-O-Sulfogalactosylceramide (d18:1/24:0), C24 sulfatide | 627 +/- 55 | 655 +/- 49 | 0.957 | **0.0412** | 0.99692 |
| Lyso 3′-sulfo Galactosylceramide, lyso-sulfatide | 37 +/- 7 | 32 +/- 6 | 1.153 | **0.0031** | 0.97853 |
| 3-O-Sulphogalactosylceramide (D18:1/22:0), C22 sulfatide | 64461 +/- 4680 | 61287 +/- 5736 | 1.052 | **0.0366** | 0.99692 |
| LactosylCeramide (18:1/16:0) | 11513 +/- 2402 | 10398 +/- 2486 | 1.107 | 0.1583 | 0.99692 |
| **Sphingomyelin & ceramides** |  | | | | |
| Sphingomyelin (32:0) | 6985 +/- 2271 | 7760 +/- 3061 | 0.900 | 0.3937 | 0.99692 |
| Sphingomyelin (32:1) | 134696 +/- 33930 | 156411 +/- 55793 | 0.861 | 0.1318 | 0.99692 |
| Sphingomyelin(36:0) | 5432 +/- 2289 | 5998 +/- 2338 | 0.906 | 0.2967 | 0.99692 |
| Sphingomyelin(40:1) | 966563 +/- 247630 | 961650 +/- 266099 | 1.005 | 0.7887 | 0.99692 |
| Sphingomyelin(42:1) | 590335 +/- 181716 | 576015 +/- 186285 | 1.025 | 0.5700 | 0.99692 |
| Ceramide(18:1/18:0) | 1316 +/- 338 | 1546 +/- 391 | 0.851 | 0.0520 | 0.99692 |
| Ceramide(42:0)iso | 2327 +/- 1019 | 2178 +/- 651 | 1.068 | 0.8996 | 0.99692 |
| Ceramide (42:1) iso | 66737 +/- 14053 | 69917 +/- 14505 | 0.955 | 0.3850 | 0.99692 |
| Ceramide (44:1) | 2498 +/- 457 | 2659 +/- 589 | 0.939 | 0.3271 | 0.99692 |
| **Neutral lipids (CE + TAGs)** |  | | | | |
| Cholesterol Ester (22:6) | 22156 +/- 6805 | 24674 +/- 6922 | 0.898 | 0.1680 | 0.99692 |
| Triacylglycerol (50:4) | 305916 +/- 217741 | 283902 +/- 137382 | 1.078 | 0.6818 | 0.99692 |
| Triacylglycerol (55:2) | 78429 +/- 9877 | 78411 +/- 9451 | 1.000 | 0.9247 | 0.99692 |
| Triacylglycerol (56:4)_iso | 67495 +/- 30483 | 65532 +/- 21483 | 1.030 | 0.8623 | 0.99692 |
| Triacylglycerol (58:8) | 546 +/- 114 | 570 +/- 142 | 0.957 | 0.6474 | 0.99692 |
| **Glycerophosphocholines (PC/LPC, including plasmalogens)** |  | | | | |
| Lysophosphatidylcholine(16:0) | 1068573 +/- 140175 | 1154983 +/- 239946 | 0.925 | **0.0324** | 0.99692 |
| Phosphatidylcholine (38:4) | 4015690 +/- 805890 | 4106720 +/- 857226 | 0.978 | 0.7405 | 0.99692 |
| Plas_Phosphatidylcholine (o-40:2) or Plas_Phosphatidylcholine (p-40:1) | 78 +/- 15 | 75 +/- 13 | 1.038 | 0.2614 | 0.99692 |
| Plas_Phosphatidylcholine (o-40:7) or Plas_Phosphatidylcholine (p-40:6) | 1499 +/- 360 | 1373 +/- 527 | 1.091 | **0.0396** | 0.99692 |
| Plas_Phosphatidylcholine (o-42:4) or Plas_Phosphatidylcholine (p-42:3) | 536 +/- 155 | 441 +/- 129 | 1.214 | **0.0118** | 0.99692 |
| Plas_Phosphatidylcholine (o-42:5) or Plas_Phosphatidylcholine (p-42:4) | 254 +/- 37 | 252 +/- 39 | 1.008 | 0.8131 | 0.99692 |
| **Other phospholipids (PE, PG, PI)** |  | | | | |
| Phosphatidylethanolamine (41:3) | 135839 +/- 52645 | 145130 +/- 54738 | 0.936 | 0.4391 | 0.99692 |
| Phosphatidylglycerol (44:0) | 561 +/- 58 | 529 +/- 67 | 1.060 | **0.0274** | 0.99692 |
| Phosphatidylglycerol (43:0) | 2331 +/- 436 | 2265 +/- 521 | 1.029 | 0.2547 | 0.99692 |
| Phosphatidylinositol (36:4) | 159 +/- 19 | 165 +/- 23 | 0.964 | 0.3678 | 0.99692 |
| **Abbreviations:**SD, standard deviation; FDR, false discovery rate; CE, cholesterol ester; TAG, triacylglycerol; PC, phosphatidylcholine; LPC, lysophosphatidylcholine; PE, phosphatidylethanolamine; PG, phosphatidylglycerol; PI, phosphatidylinositol; n-6, omega-6; iso, isomer; *o-*, 1-O-alkyl ether (plasmalogen); *p-*, 1-O-alkenyl ether (plasmalogen). | | | | | |

| **Supplementary table 5.** Correlations between lipid metabolites and body composition indices. | | | | | | | | | | |
| --- | --- | --- | --- | --- | --- | --- | --- | --- | --- | --- |
| Metabolite | SMMi (cm2/m2) | | SMD (cm2/m2) | | VATi (cm2/m2) | | SATi (cm2/m2) | | TATi (cm2/m2) | |
| ρ | p-value | ρ | p-value | ρ | p-value | ρ | p-value | ρ | p-value |
| **Carnitine** | | | | | | | | | | |
| L-carnitine | 0.193 | 0.146 | 0.033 | 0.804 | 0.047 | 0.727 | 0.228 | 0.086 | 0.075 | 0.573 |
| Acylcarnitine (C16:0) | -0.090 | 0.503 | 0.117 | 0.383 | 0.074 | 0.582 | 0.255 | 0.053 | 0.116 | 0.388 |
| Acylcarnitine (C18:0) | -0.163 | 0.222 | 0.074 | 0.582 | -0.125 | 0.352 | 0.196 | 0.140 | -0.052 | 0.696 |
| Acylcarnitine (C18:1) | -0.026 | 0.849 | 0.031 | 0.817 | 0.069 | 0.605 | 0.281 | **0.033** | 0.158 | 0.235 |
| Acylcarnitine (C18:2n-6) | -0.030 | 0.824 | 0.016 | 0.907 | -0.130 | 0.333 | 0.189 | 0.156 | -0.023 | 0.866 |
| **Sulfatides & related glycosphingolipids** | | | | | | | | | | |
| 3-O-Sulfogalactosylceramide (d18:1/24:0), C24 sulfatide | -0.108 | 0.419 | 0.144 | 0.281 | 0.093 | 0.486 | 0.125 | 0.351 | 0.092 | 0.491 |
| Lyso 3′-sulfo Galactosylceramide, lyso-sulfatide | 0.036 | 0.789 | -0.194 | 0.145 | -0.283 | **0.032** | -0.166 | 0.213 | -0.304 | **0.020** |
| 3-O-Sulphogalactosylceramide (D18:1/22:0), C22 sulfatide | 0.023 | 0.866 | -0.148 | 0.266 | -0.316 | **0.016** | -0.066 | 0.621 | -0.252 | 0.056 |
| LactosylCeramide (18:1/16:0) | -0.113 | 0.400 | -0.095 | 0.477 | -0.367 | **0.005** | -0.195 | 0.143 | -0.362 | **0.005** |
| GlucosylCeramide(36:2) | -0.110 | 0.410 | 0.063 | 0.640 | -0.331 | **0.0111** | -0.179 | 0.179 | -0.354 | **0.007** |
| **Sphingomyelin & ceramides** | | | | | | | | | | |
| Sphingomyelin (32:0) | -0.108 | 0.422 | 0.196 | 0.141 | -0.143 | 0.284 | -0.003 | 0.980 | -0.154 | 0.247 |
| Sphingomyelin (32:1) | 0.032 | 0.809 | 0.237 | 0.073 | -0.069 | 0.608 | 0.216 | 0.103 | -0.019 | 0.889 |
| Sphingomyelin(36:0) | -0.031 | 0.815 | 0.216 | 0.104 | 0.178 | 0.181 | 0.096 | 0.472 | 0.149 | 0.263 |
| Sphingomyelin(40:1) | 0.035 | 0.795 | 0.030 | 0.823 | -0.054 | 0.686 | -0.020 | 0.879 | -0.093 | 0.486 |
| Sphingomyelin(42:1) | 0.070 | 0.599 | -0.005 | 0.973 | -0.009 | 0.944 | -0.041 | 0.761 | -0.063 | 0.637 |
| Ceramide(42:1)iso | 0.093 | 0.486 | 0.137 | 0.304 | 0.093 | 0.486 | 0.000 | >0.999 | 0.044 | 0.744 |
| Ceramide(42:2) | -0.114 | 0.394 | 0.152 | 0.255 | -0.097 | 0.4675 | 0.044 | 0.741 | -0.076 | 0.573 |
| Ceramide(43:1) | 0.021 | 0.877 | 0.000 | 0.999 | -0.090 | 0.5038 | 0.065 | 0.627 | -0.067 | 0.619 |
| **Neutral lipids (Cholesterol + TAGs)** | | | | | | | | | | |
| Cholesterol | -0.004 | 0.976 | 0.036 | 0.787 | -0.240 | 0.0695 | -0.151 | 0.259 | -0.220 | 0.097 |
| Triacylglycerol(49:2) | -0.196 | 0.140 | 0.106 | 0.430 | 0.093 | 0.4869 | -0.016 | 0.908 | 0.031 | 0.819 |
| Triacylglycerol(50:5) | -0.130 | 0.332 | 0.112 | 0.401 | 0.044 | 0.7404 | -0.104 | 0.438 | -0.031 | 0.816 |
| Triacylglycerol(54:5) | -0.014 | 0.914 | 0.041 | 0.762 | 0.188 | 0.1578 | 0.042 | 0.753 | 0.159 | 0.233 |
| Triacylglycerol(55:3) | -0.192 | 0.148 | 0.223 | 0.093 | 0.218 | 0.101 | 0.014 | 0.917 | 0.137 | 0.306 |
| **Glycerophosphocholines (PC/LPC, including plasmalogens)** | | | | | | | | | | |
| Lysophosphatidylcholine (16:0) | -0.127 | 0.341 | 0.142 | 0.288 | -0.162 | 0.225 | 0.146 | 0.273 | -0.102 | 0.448 |
| Phosphatidylcholine (38:4) | -0.032 | 0.813 | 0.131 | 0.329 | 0.186 | 0.162 | -0.061 | 0.650 | 0.050 | 0.708 |
| Plas_Phosphatidylcholine (o-40:2) or Plas_Phosphatidylcholine (p-40:1) | -0.024 | 0.859 | -0.088 | 0.509 | -0.051 | 0.703 | -0.031 | 0.819 | -0.100 | 0.456 |
| Plas_Phosphatidylcholine (o-40:7) or Plas_Phosphatidylcholine (p-40:6) | -0.062 | 0.643 | -0.287 | **0.029** | -0.292 | **0.026** | -0.190 | 0.153 | -0.272 | **0.039** |
| Plas_Phosphatidylcholine (o-42:4) or Plas_Phosphatidylcholine (p-42:3) | -0.173 | 0.195 | 0.049 | 0.716 | -0.438 | **0.001** | -0.103 | 0.441 | -0.403 | **0.002** |
| Plas_Phosphatidylcholine (o-42:5) or Plas_Phosphatidylcholine (p-42:4) | -0.028 | 0.834 | 0.184 | 0.166 | 0.000 | 0.997 | 0.030 | 0.823 | -0.034 | 0.798 |
| **Other phospholipids (PE, PG, PI)** | | | | | | | | | | |
| Phosphatidylethanolamine (41:3) | 0.077 | 0.565 | 0.177 | 0.184 | 0.149 | 0.264 | 0.012 | 0.926 | 0.078 | 0.560 |
| Phosphatidylglycerol (44:0) | -0.171 | 0.199 | 0.001 | 0.992 | -0.225 | 0.090 | -0.234 | 0.077 | -0.314 | **0.016** |
| Phosphatidylglycerol (43:0) | -0.117 | 0.382 | -0.227 | 0.087 | -0.225 | 0.090 | -0.197 | 0.137 | -0.251 | 0.057 |
| Phosphatidylinositol (36:4) | -0.183 | 0.170 | -0.091 | 0.495 | -0.257 | 0.052 | -0.031 | 0.815 | -0.229 | 0.084 |
| **Abbreviations:** ρ, Spearman correlation coefficient; SMMi, skeletal muscle mass index; SMD, skeletal muscle density; VATi, visceral adipose tissue index; SATi, subcutaneous adipose tissue index; TATi, total adipose tissue index; CE, cholesterol ester; TAG, triacylglycerol; PC, phosphatidylcholine; LPC, lysophosphatidylcholine; PE, phosphatidylethanolamine; PG, phosphatidylglycerol; PI, phosphatidylinositol; n-6, omega-6; iso, isomer; *o-*, 1-O-alkyl ether (plasmalogen); *p-*, 1-O-alkenyl ether plasmalogen). | | | | | | | | | | |
